# Supplementary material
Source: publisher figshare collection journal article supplement (https://acs.figshare.com/ndownloader/files/5557049)
Supplement: Supplementary file 1 [file 5557049]

# Enhancing Photoresponsivity of Self-Aligned MoS<sub>2</sub> Field-Effect Transistor by Piezo-Phototronic Effect from GaN Nanowire

*Xingqiang Liu<sup>†+</sup>, Xiaonian Yang<sup>†+</sup>, Guoyun Gao<sup>†+</sup>, Zhenyu Yang<sup>§</sup>, Haitao Liu<sup>†</sup>, Qiang Li<sup>†</sup>,  
Zheng Lou<sup>‡</sup>, Guozhen Shen<sup>‡</sup>, Lei Liao<sup>§</sup>, Caofeng Pan<sup>†,\*</sup>, Zhong Lin Wang<sup>†,⊥</sup>*

<sup>†</sup>Beijing Institute of Nanoenergy and Nanosystems, Chinese Academy of Sciences; National Center for Nanoscience and Technology (NCNST), Beijing, 100083, P. R. China.

<sup>‡</sup> State Key Laboratory for Superlattices and Microstructures, Institute of Semiconductor, Chinese Academy of Sciences, Beijing 100083, China.

<sup>§</sup>Department of Physics and Key Laboratory of Artificial Micro- and Nano-structures of Ministry of Education, Wuhan University, Wuhan 430072, PR China.

<sup>⊥</sup>School of Materials Science and Engineering, Georgia Institute of Technology Atlanta, Georgia 30332-0245, USA

<sup>\*</sup>*To whom correspondence should be addressed. E-mail: [cfpan@binn.cas.cn](mailto:cfpan@binn.cas.cn) (C. Pan)*

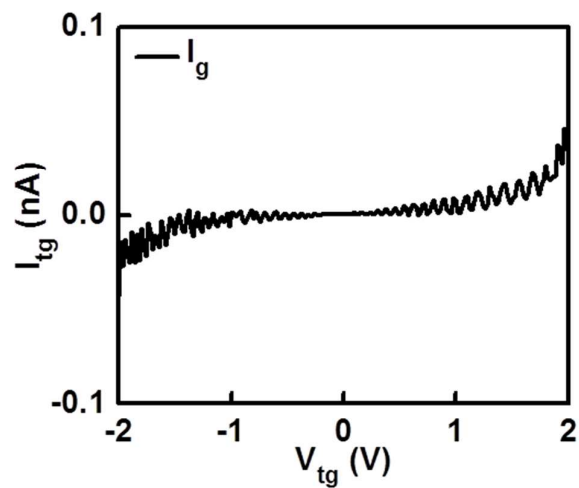

**Figure S1.** The gate leakage current of the self-aligned MoS<sub>2</sub> FET.

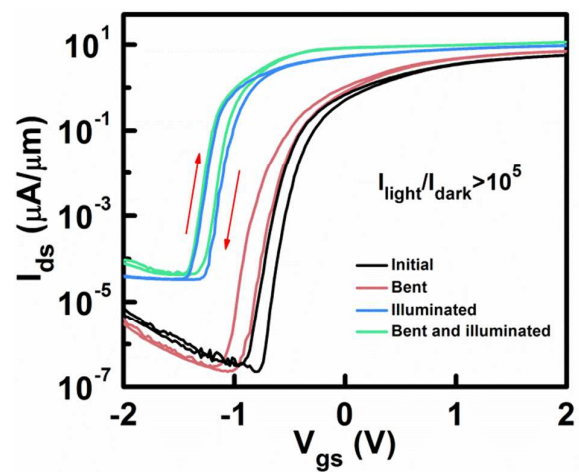

**Figure S2.** Comparison of the transfer characteristics of the same device under different test conditions with the arrows indicating hysteresis direction.
